# Supplementary material for: Large-scale sonochemical fabrication of a Co3O4–CoFe2O4@MWCNT bifunctional electrocatalyst for enhanced OER/HER performances
Source: Royal Society of Chemistry journal article supplement (doi:10.1039/d3ra03117a), 2023-01-01
Supplement: d3ra03117a1.pdf [file d3ra03117a1.pdf]

## Electronic Supplementary Information for

### Large-Scale Sonochemical Fabrication of $\text{Co}_3\text{O}_4\text{-CoFe}_2\text{O}_4\text{@MWCNT}$ Bifunctional Electrocatalyst for Enhanced OER /HER Performances

Muhammad Afaq<sup>a</sup>, Muhammad Shahid<sup>b</sup>, Iqbal Ahmad<sup>c</sup>, Sheraz Yousaf<sup>a</sup>, Amira Alazmi<sup>d</sup>, M.H.H.  
Mahmoud<sup>d</sup>, Islam H. El Azab<sup>e</sup>, Muhammad Farooq Warsi<sup>a\*</sup>

<sup>a</sup>Institute of Chemistry, Baghdad-ul-Jadeed Campus, The Islamia University of Bahawalpur, Bahawalpur, -63100, Pakistan

<sup>b</sup>Department of Chemistry, College of Science, University of Hafr Al Batin, P.O. Box 1803, Hafr Al Batin, Saudi Arabia

<sup>c</sup>Department of Chemistry, Allama Iqbal Open University, Islamabad, 44000, Pakistan

<sup>d</sup>Department of science and technology, University Colleges at Nairiyah, University of Hafr Al Batin, Nairiyah 31981, Saudi Arabia

<sup>d</sup>Department of Chemistry, College of Science, Taif University, Taif 21944, Saudi Arabia

<sup>e</sup>Department of Food Science and Nutrition, College of Science, Taif University, P.O. box 11099, Taif 21944, Saudi Arabia

Corresponding author: [farooq.warsi@iub.edu.pk](mailto:farooq.warsi@iub.edu.pk)

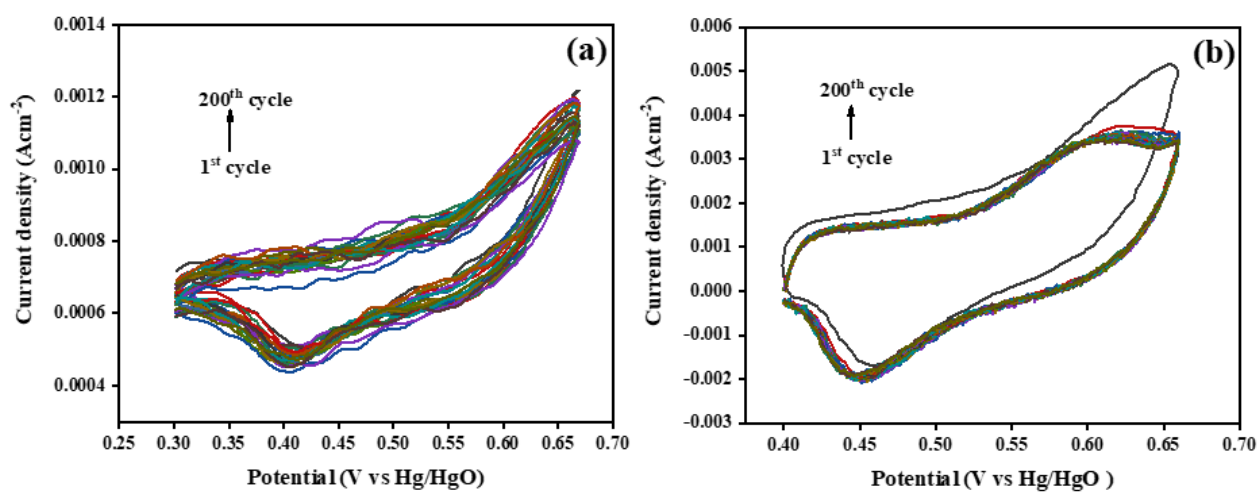

**Figure S1:** Cyclic voltammograms cycles of as-prepared product from 1<sup>st</sup> to 200<sup>th</sup> for (a)  $\text{Co}_3\text{O}_4\text{-CoFe}_2\text{O}_4$  and, (b)  $\text{Co}_3\text{O}_4\text{-CoFe}_2\text{O}_4\text{@MWCNT}$ .

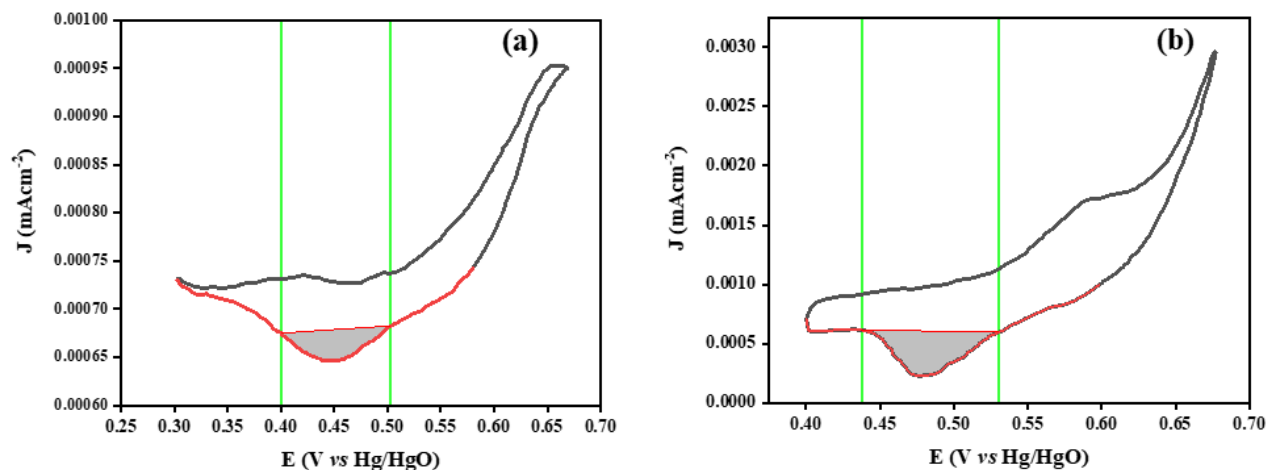

**Figure S2:** Cyclic voltammograms of fabricated samples taken at 20 mVs<sup>-1</sup> showing area under reduction peak (a) Co<sub>3</sub>O<sub>4</sub>-CoFe<sub>2</sub>O<sub>4</sub> and, (b) Co<sub>3</sub>O<sub>4</sub>-CoFe<sub>2</sub>O<sub>4</sub>@MWCNT electrocatalysts.

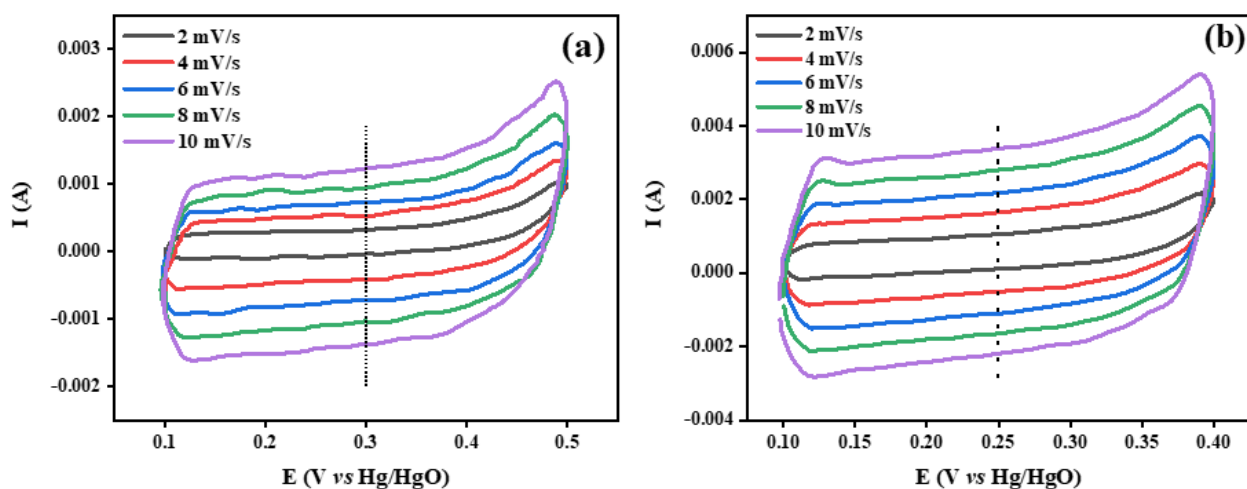

**Figure S3:** CV curves at various scan rates (mVs<sup>-1</sup>) for the determination of electrochemical active surface area of materials (a) Co<sub>3</sub>O<sub>4</sub>-CoFe<sub>2</sub>O<sub>4</sub> and, (b) Co<sub>3</sub>O<sub>4</sub>-CoFe<sub>2</sub>O<sub>4</sub>@MWCNT electrocatalysts.
